# Supplementary material for: Lipocalin-2 Regulates Osteocyte Ferroptosis and Osteocyte-Osteoblast Crosstalk via Wnt Signaling to Control Bone Formation
Source: Research Square preprint supplement (doi:10.21203/rs.3.rs-6430607/v1), 2025-04-29
Supplement: Supplementary file 1 [file 19a9ea82835022649fc58709.docx]

***Supplemental Table 1*: Primers used for SYBR and TaqMan q-PCR analysis of gene expression.**

| **Gene** | **Sequence for SYBR primers** |
| --- | --- |
| 18s RNA (sense) | 5'-CGAACGTCTGCCCTATCAAC-3' |
| 18s RNA (antisense) | 5'-GGCCTCGAAAGAGTCCTGTA-3' |
| Fgf23 (sense) | 5'-CACTGCTAGAGCCTATTC-3' |
| Fgf23 (antisense) | 5'-CACTGTAGATAGTCTGATGG-3' |
| Runx2 (sense) | 5'-GCCATCACAAACAACCACAGA-3' |
| Runx2 (antisense) | 5'-TTAAAGGCCAGAGCCTTCTT-3' |
| Dmp1 (sense) | 5'-AGTGAGGAGGACAGCCTGAA-3' |
| Dmp1 (antisense) | 5'-GAGGCTCTCGTTGGACTCAC-3' |
| β-actin (sense) | 5'-CTCTGGCTCCTAGCACCATGAAGA-3' |
| β-actin (antisense) | 5'-GTAAAACGCAGCTCAGTAACAGTCCG-3' |
|  |  |
| **Gene** | **TaqMan Probe** |
| *Rn18s* | Mm03928990_g1 |
| *Sost* | Mm00470479_m1 |
| *Gpx4* | Mm04411498_m1 |
| *Slc7a11* | Mm00442530_m1 |
| *Lcn2* | Mm01324470_m1 |
| *Slc22a17* | Mm00480680_m1 |
| *Alox5* | Mm01182747_m1 |
| *Nrf2* | Mm00477784_m1 |

**Supplemental Figures:**

**Supplemental figure S1**: **LCN2 induces oxidative stress, lipid peroxidation, and apoptosis in osteocyte-like cells.** (A) Flow cytometry analysis of DCFDA fluorescence showing increased total ROS in OCY454 cells treated with recombinant LCN2 (red) compared to untreated control (gray). (B) C11-BODIPY assay detecting lipid peroxidation, measured as oxidation-dependent shift to FITC fluorescence in LCN2-treated cells versus control. (C) TUNEL staining reveals increased apoptotic nuclei (green) in LCN2-treated cells compared to control; DAPI (blue) labels all nuclei. Scale bar: 100 µm. (D) Annexin V/PI flow cytometry plots demonstrate elevated cells in early (Annexin V⁺/PI⁻) and late (Annexin V⁺/PI⁺) stages of cell death in LCN2-treated cells relative to control.

**Supplemental figure S2: LCN2 knockdown reduces oxidative stress, lipid peroxidation, and apoptosis in osteocyte-like cells.** (A) DCFDA-based flow cytometry shows reduced total reactive oxygen species (ROS) levels in OCY454 cells transduced with LCN2 shRNA (red) compared to control shRNA (gray). (B) C11-BODIPY oxidation assay reveals decreased lipid peroxidation in LCN2 knockdown cells, indicated by reduced FITC fluorescence. (C) Annexin V/PI staining demonstrates reduced early (Annexin V⁺/PI⁻) and late (Annexin V⁺/PI⁺) apoptosis in LCN2 shRNA cells versus controls, indicating enhanced cell survival.

**Supplemental figure S3: LCN2 is a key regulator of mitochondrial dynamics in osteocytes.** (A) RNA-seq analysis of humeri from WT and Dmp1-Cre; Lcn2fl/fl mice was cross-referenced with MitoCarta3.0 to identify differentially expressed genes involved in mitochondrial function. Genes were categorized into functional groups related to cristae structure, apoptosis, mitophagy, contact sites, and mitochondrial fission. Log₂ fold change values represent gene expression differences between WT (black circles) and LCN2-deficient (red squares) osteocytes. LCN2 deletion is associated with altered expression of key regulators of mitochondrial apoptosis, mitophagy, and dynamics. (B) Seahorse extracellular flux analysis measuring oxygen consumption rate (OCR) in OCY454 osteocyte-like cells treated with recombinant murine LCN2 (100 ng/mL) for 24 hours. LCN2 treatment significantly reduces basal respiration, maximal respiration, and ATP production compared to untreated controls (*p < 0.05, Student’s t-test, n = 8-10 biological replicates/group). Data are presented as mean ± SD.

**Supplemental figure S4. LCN2 deletion increases trabecular bone mass but does not significantly alter cortical bone structure in tibias of 13-week-old male mice.** (A) Representative μCT reconstructions of trabecular (left) and cortical (right) bone from tibias of WT and Dmp1-Cre; Lcn2fl/fl male mice. Scale bar = 100 μm.(B-H) Quantitative μCT analysis of trabecular bone parameters. LCN2 deletion significantly increases trabecular bone volume fraction (BV/TV, B), trabecular number (Tb.N, D), trabecular connectivity density (Tb.Conn-Den, G), and trabecular bone mineral density (Tb.BMD, H), while reducing trabecular spacing (Tb.Sp, E). Trabecular thickness (Tb.Th, C) and structure model index (Tb.SMI, F) remain unchanged.(I-K) Cortical bone parameters assessed by μCT. LCN2 deletion does not significantly alter cortical bone area fraction (Ct.BA/TA, I), cortical thickness (Ct.Th, J), or cortical bone mineral density (Ct.BMD, K), indicating a selective effect on trabecular bone. Data are presented as mean ± SD; **p < 0.01, ***p < 0.001, ns = not significant (Student’s t-test), n = 10-12 male mice per group.
